# Supplementary material for: Transition Metal Complexes and Radical Anion Salts of 1,10-Phenanthroline Derivatives Annulated with a 1,2,5-Tiadiazole and 1,2,5-Tiadiazole 1,1-Dioxide Moiety: Multidimensional Crystal Structures and Various Magnetic Properties
Source: Molecules. 2014 Jan 7;19(1):609–40. doi: 10.3390/molecules19010609 (PMC6271449; doi:10.3390/molecules19010609)
Supplement: Supplementary file 1 [file molecules-19-00609-s001.pdf]

# **Supplementary Materials for Transition Metal Complexes and Radical Anion Salts of 1,10-Phenanthroline Derivatives Annulated with a 1,2,5-Tiadiazole and 1,2,5-Tiadiazole 1,1-Dioxide Moiety: Multidimensional Crystal Structures and Various Magnetic Properties**

## **Experimental Details**

### *X-ray Crystal Structural Analyses*

X-ray investigations were performed at 320 K and 120 K for  $[\text{Fe}(\text{tdap})_2(\text{NCS})_2] \cdot \text{MeCN}$  and at 173 K for the other compounds. Crystals were mounted on a loop using oil (CryoLoop, Immersion Oil, Type B; Hampton Research Corp. Aliso Viejo, CA, USA) for low temperature measurements and on a quartz fiber using epoxy bond (Araldite Rapid; Huntsman Corp, The Woodlands, TX, USA) and set on a Rigaku RA-Micro007 with a Saturn CCD detector by using graphite-monochromated Mo  $K\alpha$  radiation ( $\lambda = 0.710690 \text{ \AA}$ ) under a nitrogen stream. The frame data were integrated and corrected for absorption with the Rigaku/MSO CrystalClear package. The structures were solved by direct methods and standard difference map techniques, and were refined with full-matrix least-square procedures on  $F^2$  by using the Rigaku/MSO CrystalStructure package. Anisotropic refinement was applied to all non-hydrogen atoms. Hydrogen atoms in cobaltocenium ion of  $[\text{CoCp}_2] \cdot \text{tdapO}_2$  were located in a difference Fourier map and refined isotropically. All other hydrogen atoms were placed at the calculated positions and refined using a riding model. Crystallographic parameters are shown in Table S1.

### *Magnetic Measurements*

Magnetic susceptibility measurements for  $[\text{M}(\text{tdap})_2(\text{NCS})_2] \cdot \text{MeCN}$  ( $\text{M} = \text{Mn, Fe, Co, Ni, Zn}$ ) and  $[\text{CoCp}_2] \cdot \text{tdapO}_2$  were carried out on polycrystalline samples on a MPMS-SL Quantum Design magnetometer. A quartz glass tube for  $[\text{Fe}(\text{tdap})_2(\text{NCS})_2] \cdot \text{MeCN}$  and a plastic straw for the other compounds were used as the sample folder. Measurements were performed under 0.1 T for  $[\text{M}(\text{tdap})_2(\text{NCS})_2] \cdot \text{MeCN}$  ( $\text{M} = \text{Mn, Fe, Co, Ni, Zn}$ ) and under 3T for  $[\text{CoCp}_2] \cdot \text{tdapO}_2$ . The temperature dependences of the paramagnetic susceptibilities  $\chi_p$  were calculated from theoretical fitting using the diamagnetic susceptibility as a fitting parameter.

**Table S1.** Crystallographic parameters.

|                                                                         | <b>[Fe(tdap)<sub>2</sub>(NCS)<sub>2</sub>]•MeCN</b>               |                                          | <b>[Co(tdap)<sub>2</sub>(NCS)<sub>2</sub>]</b>                   | <b>[Mn(tdap)<sub>2</sub>(NCS)<sub>2</sub>]•MeCN</b>               |
|-------------------------------------------------------------------------|-------------------------------------------------------------------|------------------------------------------|------------------------------------------------------------------|-------------------------------------------------------------------|
|                                                                         | <b>HS state</b>                                                   | <b>LS state</b>                          |                                                                  |                                                                   |
| Formula                                                                 | C <sub>28</sub> H <sub>15</sub> N <sub>11</sub> S <sub>4</sub> Fe |                                          | C <sub>26</sub> H <sub>12</sub> N <sub>10</sub> CoS <sub>4</sub> | C <sub>28</sub> H <sub>15</sub> N <sub>11</sub> S <sub>4</sub> Mn |
| Formula weight                                                          | 689.59                                                            |                                          | 651.62                                                           | 688.68                                                            |
| Dimension/mm <sup>3</sup>                                               | 0.18 × 0.15 × 0.09                                                |                                          | 0.10 × 0.05 × 0.01                                               | 0.15 × 0.07 × 0.06                                                |
| <i>T</i> /K                                                             | 320                                                               | 120                                      | 173                                                              | 173                                                               |
| Crystal system                                                          | Monoclinic                                                        | Monoclinic                               | Monoclinic                                                       | Monoclinic                                                        |
| Space group                                                             | <i>P</i> 2 <sub>1</sub> / <i>n</i> (#14)                          | <i>P</i> 2 <sub>1</sub> / <i>n</i> (#14) | <i>C</i> 2/ <i>c</i> (#15)                                       | <i>P</i> 2 <sub>1</sub> / <i>n</i> (#14)                          |
| <i>a</i> /Å                                                             | 11.7576(14)                                                       | 11.525(2)                                | 7.476(2)                                                         | 11.7681(17)                                                       |
| <i>b</i> /Å                                                             | 18.829(2)                                                         | 18.670(3)                                | 16.514(5)                                                        | 18.664(3)                                                         |
| <i>c</i> /Å                                                             | 13.3450(15)                                                       | 12.992(2)                                | 21.678(6)                                                        | 13.3313(18)                                                       |
| <i>α</i> /°                                                             |                                                                   |                                          |                                                                  |                                                                   |
| <i>β</i> /°                                                             | 99.4530(15)                                                       | 98.722(2)                                | 96.728(4)                                                        | 100.218(2)                                                        |
| <i>γ</i> /°                                                             |                                                                   |                                          |                                                                  |                                                                   |
| <i>V</i> /Å <sup>3</sup>                                                | 2914.3(6)                                                         | 2763.2(8)                                | 2657.8(13)                                                       | 2881.7(7)                                                         |
| <i>Z</i>                                                                | 4                                                                 | 4                                        | 4                                                                | 4                                                                 |
| <i>D</i> <sub>calc</sub> /g cm <sup>−3</sup>                            | 1.572                                                             | 1.658                                    | 1.628                                                            | 1.587                                                             |
| <i>μ</i> (Mo Kα)/cm <sup>−1</sup>                                       | 8.456                                                             | 8.919                                    | 9.996                                                            | 7.903                                                             |
| <i>F</i> (000)                                                          | 1400.00                                                           | 1400.00                                  | 1316.00                                                          | 1396.00                                                           |
| 2 $\theta_{\max}$ /°                                                    | 54.9                                                              | 54.9                                     | 55.0                                                             | 55.0                                                              |
| Reflections collected                                                   | 22443                                                             | 21585                                    | 10575                                                            | 22973                                                             |
| Unique reflections ( <i>R</i> <sub>int</sub> )                          | 6544                                                              | 6206                                     | 2980                                                             | 6556                                                              |
|                                                                         | (0.025)                                                           | (0.028)                                  | (0.050)                                                          | (0.045)                                                           |
| Number of parameters                                                    | 398                                                               | 398                                      | 187                                                              | 398                                                               |
| Final <i>R</i> <sub>1</sub> [ <i>I</i> > 2σ( <i>I</i> )] <sup>[a]</sup> | 0.0366                                                            | 0.0378                                   | 0.0474                                                           | 0.0411                                                            |
| <i>wR</i> <sub>2</sub> <sup>[b]</sup>                                   | 0.0958                                                            | 0.0912                                   | 0.1172                                                           | 0.1082                                                            |
| Goodness-of-fit                                                         | 1.044                                                             | 1.040                                    | 1.067                                                            | 1.078                                                             |

Table S1. Cont.

|                                                                         | [Co(tdap) <sub>2</sub> (NCS) <sub>2</sub> ]<br>•MeCN              | [Ni(tdap) <sub>2</sub> (NCS) <sub>2</sub> ]<br>•MeCN              | [Cu(tdap) <sub>2</sub> (NCS) <sub>2</sub> ]<br>•MeCN              | [Zndap) <sub>2</sub> (NCS) <sub>2</sub> ]<br>•MeCN                |
|-------------------------------------------------------------------------|-------------------------------------------------------------------|-------------------------------------------------------------------|-------------------------------------------------------------------|-------------------------------------------------------------------|
| Formula                                                                 | C <sub>28</sub> H <sub>15</sub> N <sub>11</sub> S <sub>4</sub> Co | C <sub>28</sub> H <sub>15</sub> N <sub>11</sub> S <sub>4</sub> Ni | C <sub>28</sub> H <sub>15</sub> N <sub>11</sub> S <sub>4</sub> Cu | C <sub>28</sub> H <sub>15</sub> N <sub>11</sub> S <sub>4</sub> Zn |
| Formula weight                                                          | 692.67                                                            | 692.44                                                            | 697.29                                                            | 699.12                                                            |
| Dimension/mm <sup>3</sup>                                               | 0.12 × 0.09 × 0.08                                                | 0.07 × 0.07 × 0.04                                                | 0.20 × 0.20 × 0.20                                                | 0.15 × 0.10 × 0.10                                                |
| <i>T</i> /K                                                             | 173                                                               | 173                                                               | 173                                                               | 173                                                               |
| Crystal system                                                          | Monoclinic                                                        | Monoclinic                                                        | Monoclinic                                                        | Monoclinic                                                        |
| Space group                                                             | <i>P</i> 2 <sub>1</sub> / <i>n</i> (#14)                          | <i>C</i> 2/ <i>c</i> (#15)                                        | <i>P</i> 2 <sub>1</sub> / <i>n</i> (#14)                          | <i>P</i> 2 <sub>1</sub> / <i>n</i> (#14)                          |
| <i>a</i> /Å                                                             | 11.6350(18)                                                       | 9.491(2)                                                          | 11.6129(19)                                                       | 11.6761(11)                                                       |
| <i>b</i> /Å                                                             | 18.691(3)                                                         | 15.380(4)                                                         | 18.761(3)                                                         | 18.7392(17)                                                       |
| <i>c</i> /Å                                                             | 13.203(2)                                                         | 19.967(5)                                                         | 13.179(2)                                                         | 13.2026(12)                                                       |
| <i>α</i> /°                                                             |                                                                   |                                                                   |                                                                   |                                                                   |
| <i>β</i> /°                                                             | 99.627(3)                                                         | 102.708(4)                                                        | 98.535(2)                                                         | 99.4276(13)                                                       |
| <i>γ</i> /°                                                             |                                                                   |                                                                   |                                                                   |                                                                   |
| <i>V</i> /Å <sup>3</sup>                                                | 2830.8(8)                                                         | 2843.2(12)                                                        | 2839.5(8)                                                         | 2849.7(5)                                                         |
| <i>Z</i>                                                                | 4                                                                 | 4                                                                 | 4                                                                 | 4                                                                 |
| <i>D</i> <sub>calc</sub> /g cm <sup>−3</sup>                            | 1.625                                                             | 1.617                                                             | 1.631                                                             | 1.629                                                             |
| <i>μ</i> (Mo Kα)/cm <sup>−1</sup>                                       | 9.448                                                             | 10.193                                                            | 11.066                                                            | 11.982                                                            |
| <i>F</i> (000)                                                          | 1404.00                                                           | 1408.00                                                           | 1412.00                                                           | 1416.00                                                           |
| 2 $\theta_{\max}$ /°                                                    | 55.0                                                              | 55.0                                                              | 55.0                                                              | 55.0                                                              |
| Reflections collected                                                   | 22649                                                             | 11326                                                             | 22632                                                             | 22576                                                             |
| Unique reflections ( <i>R</i> <sub>int</sub> )                          | 6409<br>(0.043)                                                   | 3192<br>(0.041)                                                   | 6405<br>(0.039)                                                   | 6487<br>(0.026)                                                   |
| Number of parameters                                                    | 398                                                               | 202                                                               | 398                                                               | 398                                                               |
| Final <i>R</i> <sub>1</sub> [ <i>I</i> > 2σ( <i>I</i> )] <sup>[a]</sup> | 0.0438                                                            | 0.0394                                                            | 0.0471                                                            | 0.0298                                                            |
| <i>wR</i> <sub>2</sub> <sup>[b]</sup>                                   | 0.1126                                                            | 0.0890                                                            | 0.1074                                                            | 0.0711                                                            |
| Goodness-of-fit                                                         | 1.062                                                             | 1.072                                                             | 1.089                                                             | 1.049                                                             |

Table S1. Cont.

|                                                 | [Mn(tdap) <sub>2</sub> Cl <sub>2</sub> ]                                         | [Cu <sub>2</sub> (tdap) <sub>2</sub> (NCS) <sub>2</sub> ]                      | [Cu <sub>2</sub> (tdap) <sub>2</sub> (NCS) <sub>4</sub> ]       | [CoCp <sub>2</sub> ]•tdapO <sub>2</sub>                           |
|-------------------------------------------------|----------------------------------------------------------------------------------|--------------------------------------------------------------------------------|-----------------------------------------------------------------|-------------------------------------------------------------------|
| Formula                                         | C <sub>24</sub> H <sub>12</sub> N <sub>8</sub> S <sub>2</sub> Cl <sub>2</sub> Mn | C <sub>26</sub> H <sub>12</sub> N <sub>10</sub> S <sub>4</sub> Cu <sub>2</sub> | C <sub>14</sub> H <sub>6</sub> N <sub>6</sub> S <sub>3</sub> Cu | C <sub>22</sub> H <sub>16</sub> N <sub>4</sub> O <sub>2</sub> SCo |
| Formula weight                                  | 602.38                                                                           | 719.78                                                                         | 417.97                                                          | 459.39                                                            |
| Dimension/mm <sup>3</sup>                       | 0.20 × 0.20 ×<br>0.01                                                            | 0.15 × 0.05 × 0.01                                                             | 0.10 × 0.05 × 0.02                                              | 0.10 × 0.07 ×<br>0.01                                             |
| T/K                                             | 173                                                                              | 173                                                                            | 173                                                             | 173                                                               |
| Crystal system                                  | Monoclinic                                                                       | Monoclinic                                                                     | Triclinic                                                       | Orthorhombic                                                      |
| Space group                                     | C2/c (#15)                                                                       | P2 <sub>1</sub> /c (#14)                                                       | P $\bar{1}$ (#2)                                                | Pbca (#61)                                                        |
| a/Å                                             | 8.277(3)                                                                         | 9.1233(17)                                                                     | 8.2240(19)                                                      | 8.274(4)                                                          |
| b/Å                                             | 12.142(5)                                                                        | 19.608(4)                                                                      | 8.314(2)                                                        | 16.528(7)                                                         |
| c/Å                                             | 22.935(9)                                                                        | 7.5173(14)                                                                     | 11.979(3)                                                       | 27.116(12)                                                        |
| α/°                                             |                                                                                  |                                                                                | 102.996(3)                                                      |                                                                   |
| β/°                                             | 93.665(6)                                                                        | 109.386(2)                                                                     | 105.900(4)                                                      |                                                                   |
| γ/°                                             |                                                                                  |                                                                                | 90.120(3)                                                       |                                                                   |
| V/Å <sup>3</sup>                                | 2300.1(16)                                                                       | 1268.5(4)                                                                      | 765.7(3)                                                        | 3708(3)                                                           |
| Z                                               | 4                                                                                | 2                                                                              | 2                                                               | 8                                                                 |
| D <sub>calc</sub> /g cm <sup>−3</sup>           | 1.739                                                                            | 1.884                                                                          | 1.813                                                           | 1.646                                                             |
| μ(Mo Kα)/cm <sup>−1</sup>                       | 10.221                                                                           | 20.482                                                                         | 18.436                                                          | 10.679                                                            |
| F(000)                                          | 1212.00                                                                          | 720.00                                                                         | 418.00                                                          | 1880.00                                                           |
| 2θ <sub>max</sub> /°                            | 54.9                                                                             | 55.0                                                                           | 55.0                                                            | 55.0                                                              |
| Reflections collected                           | 8983                                                                             | 9991                                                                           | 6169                                                            | 26180                                                             |
| Unique reflections (R <sub>int</sub> )          | 2618<br>(0.071)                                                                  | 2810<br>(0.062)                                                                | 3376<br>(0.023)                                                 | 4254<br>(0.065)                                                   |
| Number of parameters                            | 169                                                                              | 191                                                                            | 218                                                             | 312                                                               |
| Final R <sub>1</sub> [I > 2σ(I)] <sup>[a]</sup> | 0.0519                                                                           | 0.0309                                                                         | 0.0307                                                          | 0.0683                                                            |
| wR <sub>2</sub> <sup>[b]</sup>                  | 0.1150                                                                           | 0.0813                                                                         | 0.0741                                                          | 0.1385                                                            |
| Goodness-of-fit                                 | 1.131                                                                            | 0.859                                                                          | 1.063                                                           | 1.141                                                             |

<sup>[a]</sup>  $R_1 = \sum ||F_o| - |F_c|| / \sum |F_o|$ ; <sup>[b]</sup>  $wR_2 = [\sum \{w(F_o^2 - F_c^2)^2\} / \sum w(F_o^2)^2]^{1/2}$ .
